# Supplementary material for: Upper Critical Solution Temperature (UCST) Behavior of Polystyrene-Based Polyampholytes in Aqueous Solution
Source: Polymers (Basel). 2019 Feb 4;11(2):265. doi: 10.3390/polym11020265 (PMC6419060; doi:10.3390/polym11020265)
Supplement: Supplementary file 1 [file polymers-11-00265-s001.pdf]

## Supporting Information

### Upper Critical Solution Temperature (UCST) Behavior of Polystyrene-based Polyampholytes in Aqueous Solution

Komol Kanta Sharker<sup>1</sup>, Yuki Ohara<sup>1</sup>, Yusuke Shigeta<sup>2</sup>, Shinji Ozoe<sup>2</sup> and Shin-ichi Yusa<sup>1,\*</sup>

<sup>1</sup> Department of Applied Chemistry, Graduate School of Engineering, University of Hyogo,  
2167 Shosha, Himeji, Hyogo 671-2280, Japan

<sup>2</sup> Tosoh Finechem Co., 4988 Kaisei-cho, Shunan, Yamaguchi 746-0006, Japan

\* Correspondence: yusa@eng.u-hyogo.ac.jp; Tel: +81-79-267-4954; Fax: +81-79-266-8868

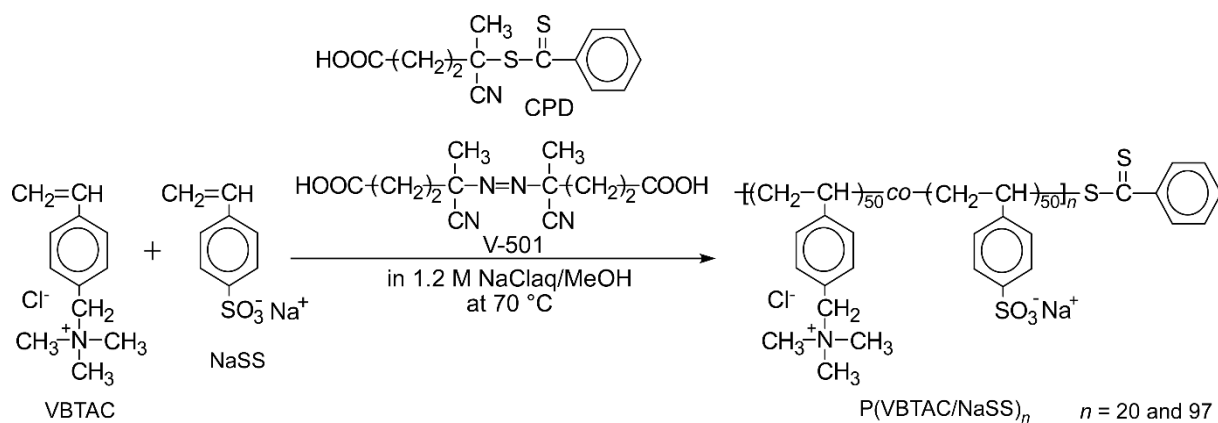

**Figure S1.** Synthesis scheme of P(VBTAC/NaSS)<sub>n</sub>.

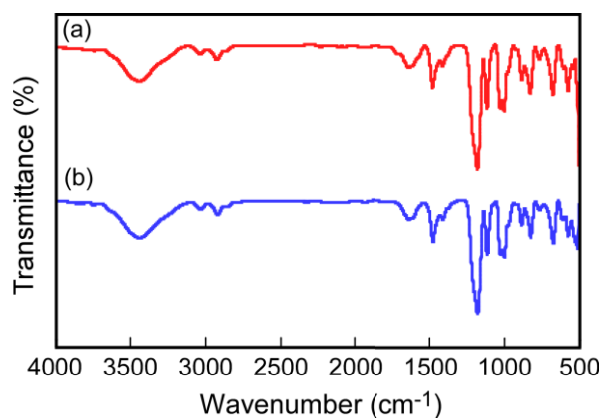

**Figure S2.** ATR-IR spectra for (a) P(VBTAC/NaSS)<sub>20</sub> and (b) P(VBTAC/NaSS)<sub>97</sub>.

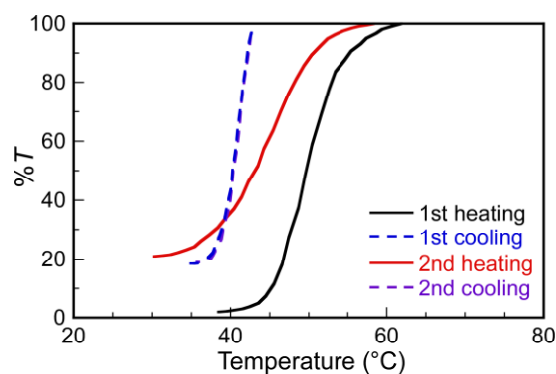

**Figure S3.** Percent transmittance (%*T*) at 700 nm for 0.1 M NaCl aqueous P(VBTAC/NaSS)<sub>20</sub>

at  $C_p = 1.0$  g/L as a function of temperature upon heating and cooling.

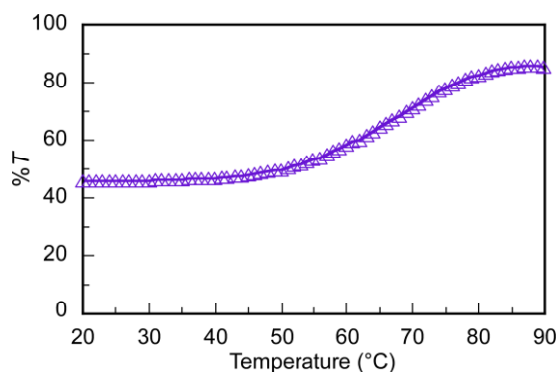

**Figure S4.** Percent transmittance (%*T*) at 700 nm for P(VBTAC/NaSS)<sub>97</sub> at  $C_p = 2.0$  g/L in

pure water as a function of temperature upon cooling.

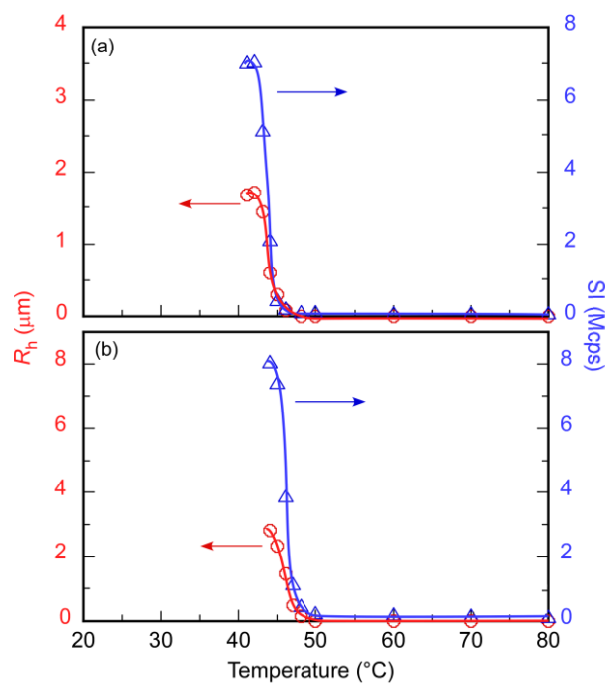

**Figure S5.** Hydrodynamic radii ( $R_h$ ,  $\circ$ ) and light scattering intensities (SI,  $\triangle$ ) for (a) P(VBTAC/NaSS)<sub>20</sub> at  $[\text{NaCl}] = 0.1 \text{ M}$  and (b) P(VBTAC/NaSS)<sub>97</sub> at  $[\text{NaCl}] = 1.0 \text{ M}$  with  $C_p = 2.0 \text{ g/L}$  as a function of temperature.

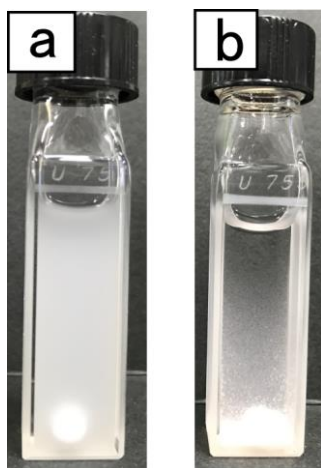

**Figure S6.** (a) Dispersion of P(VBTAC/NaSS)<sub>97</sub> just below the UCST and (b) flocculation of the polymer below the UCST upon standing for 2 h.

**Table S1.** Maximum fluorescence wavelength ( $\lambda_{\max}$ ) of PNA in the absence and presence of P(VBTAC/NaSS) $_n$  in aqueous solutions at 20 and 70 °C

| Sample                | without polymer <sup>a</sup> |     | P(VBTAC/NaSS) <sub>20</sub> <sup>b</sup> |     | P(VBTAC/NaSS) <sub>97</sub> <sup>c</sup> |     |
|-----------------------|------------------------------|-----|------------------------------------------|-----|------------------------------------------|-----|
| Temperature ( °C)     | 20                           | 70  | 20                                       | 70  | 20                                       | 70  |
| $\lambda_{\max}$ (nm) | 463                          | 452 | 412                                      | 417 | 417                                      | 423 |

<sup>a</sup>In pure water. <sup>b</sup>At  $C_p = 2.0$  g/L in 0.1 M NaCl solutions. <sup>c</sup>At  $C_p = 2.0$  g/L in 1.0 M NaCl aqueous solutions.

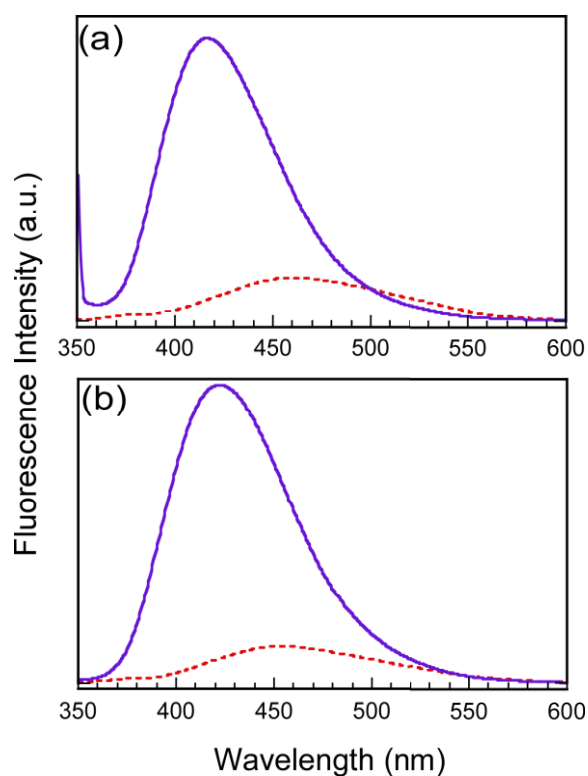

**Figure S7.** Typical examples of fluorescence emission spectra for PNA in the absence (---) and presence of P(VBTAC/NaSS)<sub>97</sub> (—) at  $C_p = 2$  g/L in 1.0 M NaCl aqueous solutions at (a) 20 and (b) 70 °C.

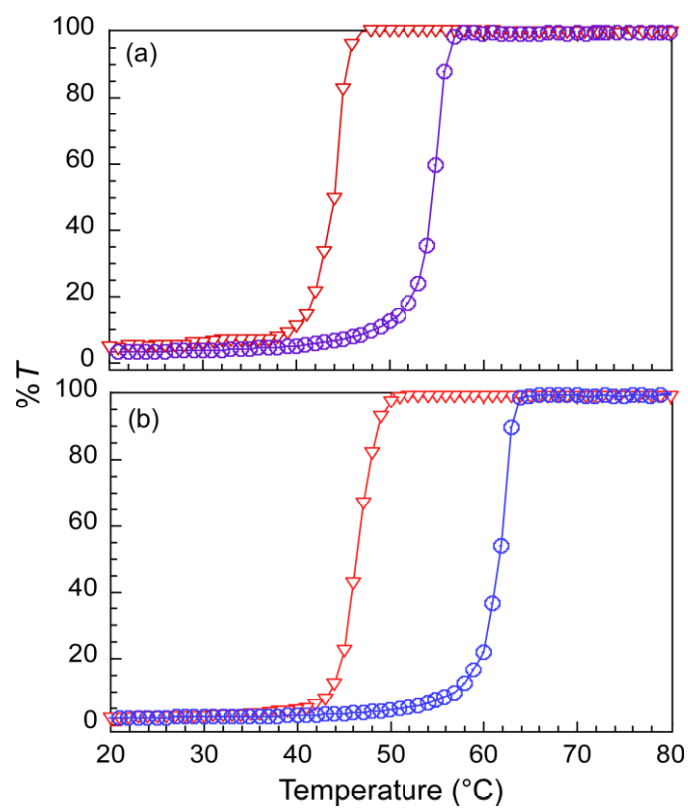

**Figure S8.** Percent transmittance ( $\%T$ ) at 700 nm for  $\text{H}_2\text{O}$  ( $\nabla$ ) and  $\text{D}_2\text{O}$  ( $\circ$ ) solutions of (a)  $\text{P(VBTAC/NaSS)}_{20}$  at  $[\text{NaCl}] = 0.1 \text{ M}$  and (b)  $\text{P(VBTAC/NaSS)}_{97}$  at  $[\text{NaCl}] = 1.0 \text{ M}$  with  $C_p = 2 \text{ g/L}$  as a function of temperature.
